# Supplementary material
Source: publisher figshare collection journal article supplement (https://frontiersin.figshare.com/ndownloader/files/24832481)
Supplement: Supplementary file 1 [file 24832481]

Supplementary Material


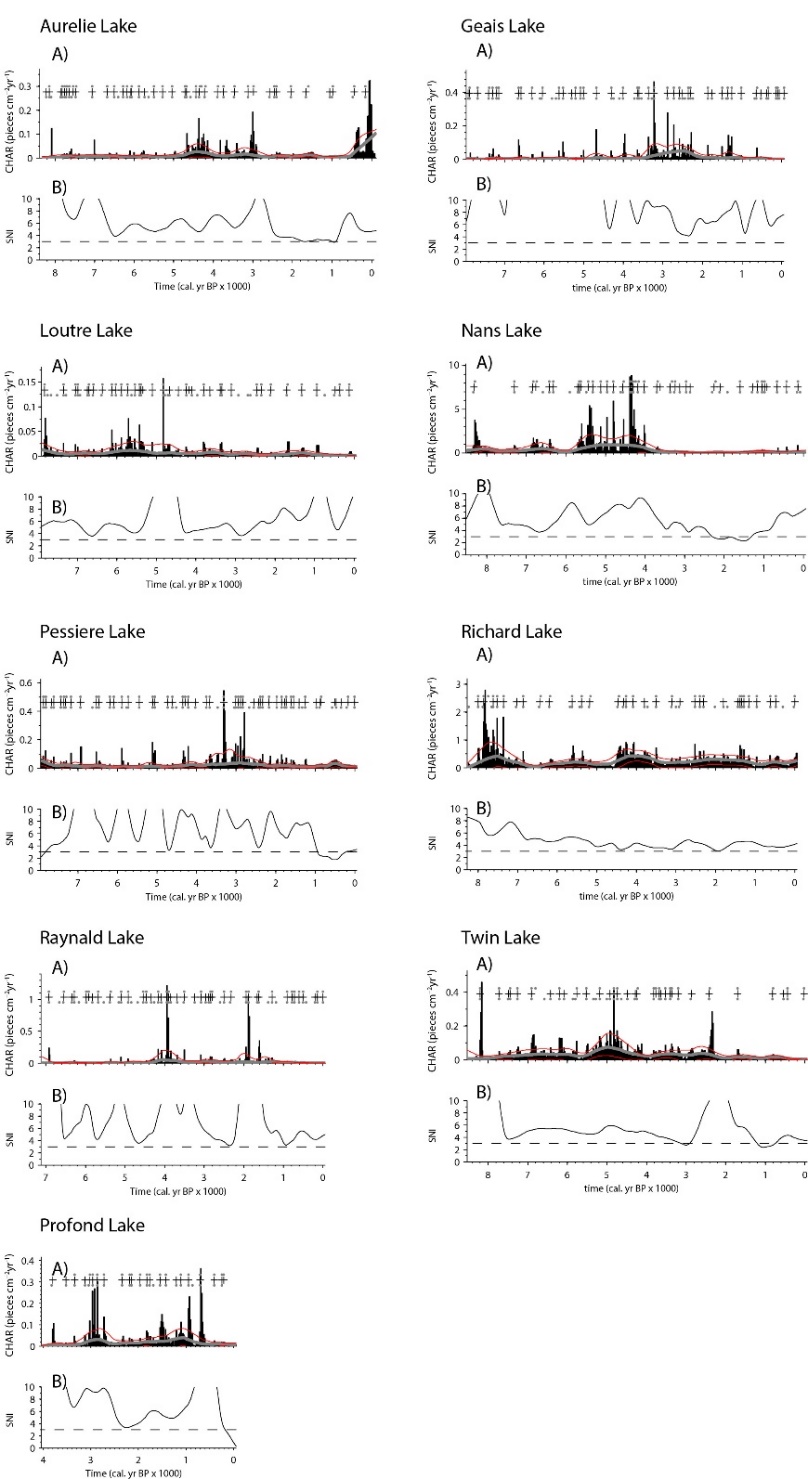


# Supplementary Figure 1. CharAnalysis output checks for all charcoal extracted from lakes located in the coniferous boreal forest. For each lake, panel A presents the charcoal influx, with associated charcoal background (mean noise in grey) and its confidence intervals (in red) from which significant charcoal peaks (crosses) were retrieved over time. Similarly, panel B reports the Signal-to-Noise Index (SNI) with its changes over time, to check when SNI values fall below the threshold value of 3 (dashed line), as suggested by [Kelly *et al.*](#_ENREF_14) (2011), which would indicate that a fire frequency reconstruction had been overestimated as a result of false fire events. Over the last 1000 years, SNI values lower than 3 only occurred temporarily for three of the nine lake records (Pessière, Twin, and Profond Lakes, respectively).

Kelly, R., Higuera, P., Barrett, C. M., and Hu, F. S. (2011). A signal-to-noise index to quantify the potential for peak detection in sediment–charcoal records. *Quaternary Research* 75, 11–17.
